# Supplementary material
Source: HighWire-hosted journal article supplement (http://www.ajnr.org/highwire/filestream/77924/field_highwire_adjunct_files/0/20-00786.pdf)
Supplement: 20-00786.pdf [file 20-00786.pdf]

**On-line Table: Clinical characteristics**

| Variable                                              | Patient 1                                                     | Patient 2                                                                                                                        | Patient 3                                                                                                                                      |
|-------------------------------------------------------|---------------------------------------------------------------|----------------------------------------------------------------------------------------------------------------------------------|------------------------------------------------------------------------------------------------------------------------------------------------|
| Age (yr)                                              | 56                                                            | 64                                                                                                                               | 75                                                                                                                                             |
| Sex                                                   | Male                                                          | Female                                                                                                                           | Male                                                                                                                                           |
| Medical problems                                      | HTN, DM                                                       | HTN, DM <sup>a</sup>                                                                                                             | HL, iliac aneurysm                                                                                                                             |
| Smoking history                                       | Never                                                         | Current                                                                                                                          | Former 20 pack-years                                                                                                                           |
| Antithrombotics at presentation                       | Aspirin, 81 mg daily                                          | Aspirin, 81 mg daily, enoxaparin, 40 mg                                                                                          | Aspirin, 81 mg daily                                                                                                                           |
| HMG-CoA reductase inhibitors at presentation          |                                                               | Atorvastatin, 80 mg                                                                                                              | Atorvastatin, 40 mg                                                                                                                            |
| ACEI or ARB at presentation                           |                                                               | Lisinopril, 20 mg                                                                                                                | Left CCA/ICA                                                                                                                                   |
| Thrombus location                                     | Left CCA/ICA                                                  | Right CCA/ICA                                                                                                                    |                                                                                                                                                |
| Treatment for stroke                                  | Heparin drip, open thrombectomy, and carotid endarterectomy   | Initially aspirin 81 mg daily, and apixaban, 2.5 mg bid, followed by heparin drip, open thrombectomy, and carotid endarterectomy | Initially aspirin 81 mg, clopidogrel 75 mg daily, apixaban 2.5 mg bid, followed by heparin drip, open thrombectomy, and carotid endarterectomy |
| Time from presentation to surgery (days)              | 3                                                             | 6                                                                                                                                | 18                                                                                                                                             |
| COVID-19 diagnostic method                            | Nasal swab RT-PCR                                             | CT chest and positive antibody                                                                                                   | Nasal swab RT-PCR                                                                                                                              |
| COVID-19 symptoms                                     | Fever, chills, cough, dyspnea (no O <sub>2</sub> requirement) | Confusion, generalized weakness, hypoxia (required up to 10L/min O <sub>2</sub> on nonbreather mask)                             | Hypoxia (required up to 5 L/min O <sub>2</sub> on nasal cannula)                                                                               |
| Duration of COVID-19 symptoms preceding stroke (days) | 12                                                            | 12                                                                                                                               |                                                                                                                                                |
| NIHSS <sup>b</sup>                                    | 8                                                             | 9                                                                                                                                | 4                                                                                                                                              |
| Hospital presenting symptoms                          | Aphasia, right hemiparesis                                    | Lethargy that resolved, followed by left neglect and hemiparesis                                                                 | Right face and hand weakness                                                                                                                   |
| LDL (mg/dL)                                           | 68                                                            | 113                                                                                                                              | 159                                                                                                                                            |
| Hemoglobin A1C (<5.7%)                                | 8.5                                                           | 13.9                                                                                                                             | 6.2                                                                                                                                            |
| C-reactive protein (<0.8 mg/dL)                       | 6.2                                                           | 14.7                                                                                                                             | 1.0                                                                                                                                            |
| Sedimentation rate (0–30 mm/h)                        | 127                                                           | 99                                                                                                                               | 79                                                                                                                                             |
| D-dimer (0–0.5 µg/mL)                                 | 0.8                                                           | 1.81                                                                                                                             | 1.67                                                                                                                                           |
| Fibrinogen (187–502 mg/dL)                            |                                                               |                                                                                                                                  | 701                                                                                                                                            |
| Ferritin (25–270 ng/mL)                               | 66                                                            | 2,308                                                                                                                            | 582                                                                                                                                            |
| Troponin (<0.1 ng/mL)                                 | 0.01                                                          | 0.01                                                                                                                             | 0.01                                                                                                                                           |
| White cell count (5–11 k/µL)                          | 5.8                                                           | 8.5                                                                                                                              | 9.9                                                                                                                                            |
| Platelet count (150–400 k/µL)                         | 417                                                           | 240                                                                                                                              | 201                                                                                                                                            |
| Prothrombin time (12–15 sec)                          | 15                                                            | 17                                                                                                                               | 14.4                                                                                                                                           |
| Activated partial thromboplastin time (26–40 sec)     | 35                                                            | 30                                                                                                                               | 51.2                                                                                                                                           |

**Note:**—ACEI indicates angiotensin-converting enzyme inhibitors; ARB, angiotensin II receptor blocker; HTN, hypertension; DM, diabetes mellitus; HL, hyperlipidemia; LDL, low-density lipoprotein; HMG-CoA, ; CCA, common carotid artery; ICA, internal carotid artery; RT-PCR, reverse-transcriptase polymerase chain reaction; bid, twice a day.

<sup>a</sup>The patient was found to have a lung mass along with multifocal peripheral ground glass opacities. She was diagnosed with COVID-19 on the basis of clinical suspicion and imaging findings and is undergoing separate malignancy evaluation.

<sup>b</sup>NIHSS scores range from 0 to 42, with higher numbers indicating greater stroke severity.
